# Supplementary material for: Sexual harassment at work within Belgian Defence: a prevalence study
Source: HighWire-hosted journal article supplement (doi:10.1136/bmjmilitary-2021-001855), 2021-08-20
Supplement: bmjmilitary-2021-001855supp001_data_supplement.pdf [file bmjmilitary-2021-001855supp001_data_supplement.pdf]

*Faculty of Medicine and Health Sciences***Interview guide:**

|                     |                                                                                                                                                                                                                                                                                                                                                                                                                                                                                                                                                                                                                                                                                                                                                                                                                                                                                                                                                                                                                                                          |
|---------------------|----------------------------------------------------------------------------------------------------------------------------------------------------------------------------------------------------------------------------------------------------------------------------------------------------------------------------------------------------------------------------------------------------------------------------------------------------------------------------------------------------------------------------------------------------------------------------------------------------------------------------------------------------------------------------------------------------------------------------------------------------------------------------------------------------------------------------------------------------------------------------------------------------------------------------------------------------------------------------------------------------------------------------------------------------------|
|                     |                                                                                                                                                                                                                                                                                                                                                                                                                                                                                                                                                                                                                                                                                                                                                                                                                                                                                                                                                                                                                                                          |
| <b>INTRODUCTION</b> | <b>Introduction</b><br><b>Anonymity and confidentiality</b><br><b>Recording</b>                                                                                                                                                                                                                                                                                                                                                                                                                                                                                                                                                                                                                                                                                                                                                                                                                                                                                                                                                                          |
| <b>INTERVIEW</b>    | <b>Main question:</b> 'What experience did you have with sexual harassment in the unit/department where you work'?<br><b>Topics:</b> <ul style="list-style-type: none"> <li>• In what circumstances/location was this? At practice/during working hours/on a mission abroad, ...?</li> <li>• What was your reaction to this?</li> <li>• How did the person react to the rejection or to your reaction?</li> <li>• Have you reported the behavior?</li> <li>• What was the reaction of superiors/colleagues/partner?</li> <li>• Have they taken measures/actions in the unit/department?</li> <li>• How do you see the future? Is there a need to raise awareness concerning this problem in the unit/department?</li> </ul> <b>Side questions:</b> <ul style="list-style-type: none"> <li>• Why did you say this?</li> <li>• How did this start?</li> <li>• What thoughts did you have?</li> <li>• Could you talk to someone about it?</li> <li>• How does that make you feel?</li> <li>• What happened then?</li> <li>• Why did this happen?</li> </ul> |
| <b>CLOSING</b>      |                                                                                                                                                                                                                                                                                                                                                                                                                                                                                                                                                                                                                                                                                                                                                                                                                                                                                                                                                                                                                                                          |
